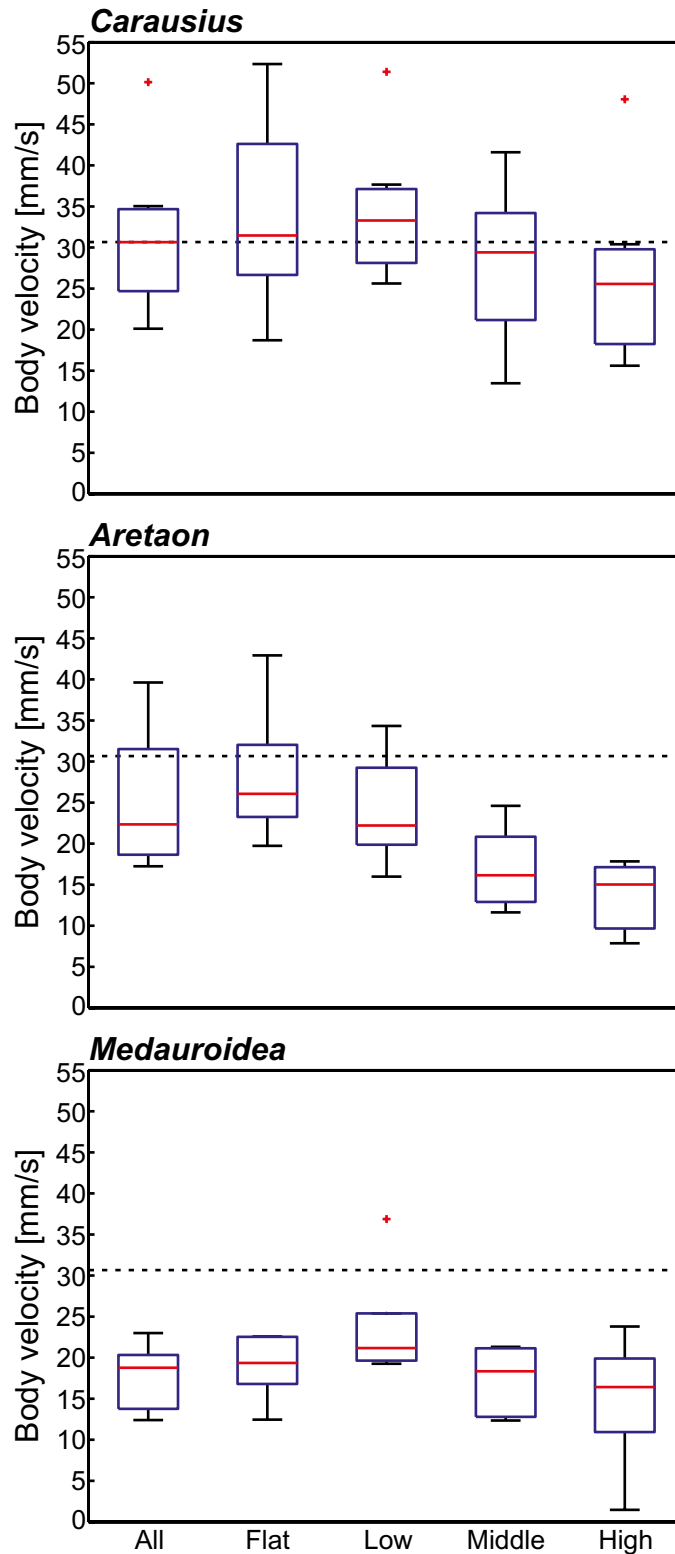

**Fig. S1. Body velocity decreases from walking to climbing.** Average velocities per trial of *Carausius* (top), *Aretaon* (middle) and *Medauroidea* (bottom) for the different conditions (Flat; Low; Middle; High) and for the pooled data (All). The box plots show the medians (red), inter-quartile range (blue) and entire ranges. Red dots are outliers. Black dotted line indicates median velocity of all *Carausius* trials. *Carausius* walked faster than the other two species. *Medauroidea* was slowest (despite being the largest) and showed hardly any change in walking velocity across conditions. The number of animals and trials differs between species: *Carausius*  $N=9$  ( $n=323$ ); *Aretaon*  $N=8$  ( $n=186$ ); *Medauroidea*  $N=6$  ( $n=167$ ).

Table S1: Statistics for the mean swing directions

| Genus              | length | HL  |      |      |        |      | ML  |      |      |        |      | FL  |      |      |        |      |
|--------------------|--------|-----|------|------|--------|------|-----|------|------|--------|------|-----|------|------|--------|------|
|                    |        | dir | r    | SD   | p      | z    | dir | r    | SD   | p      | z    | dir | r    | SD   | p      | z    |
| <i>Carausius</i>   | long   | -2  | 0.97 | 0.23 | <0.001 | 4879 | 1   | 0.97 | 0.26 | <0.001 | 4813 | -2  | 0.91 | 0.45 | <0.001 | 4048 |
|                    | short  | 42  | 0.19 | 1.83 | <0.001 | 23   | 25  | 0.13 | 2.01 | <0.001 | 18   | -60 | 0.11 | 2.10 | <0.001 | 21   |
| <i>Aretaon</i>     | long   | 1   | 0.97 | 0.24 | <0.001 | 3116 | -2  | 0.97 | 0.24 | <0.001 | 3140 | 2   | 0.93 | 0.39 | <0.001 | 2833 |
|                    | short  | 19  | 0.40 | 1.36 | <0.001 | 44   | 31  | 0.44 | 1.27 | <0.001 | 89   | -14 | 0.29 | 1.56 | <0.001 | 65   |
| <i>Medauroidea</i> | long   | 0   | 0.98 | 0.20 | <0.001 | 1147 | 0   | 0.97 | 0.24 | <0.001 | 1218 | 3   | 0.90 | 0.47 | <0.001 | 856  |
|                    | short  | 32  | 0.18 | 1.85 | <0.001 | 31   | 70  | 0.12 | 2.04 | <0.001 | 26   | -23 | 0.11 | 2.11 | <0.001 | 15   |

Mean swing direction vectors differ between long and short steps. The direction (dir [°]), the length (r), the standard deviation (SD), the p-value and the z-value of the circular statistics are given for short and long steps of each leg type and of each species.
